# Supplementary material
Source: PubMed Central journal article supplement (PMC4319424)
Supplement: JCI73722sd.pdf [file JCI73722sd.pdf]

Supplementary Fig 1

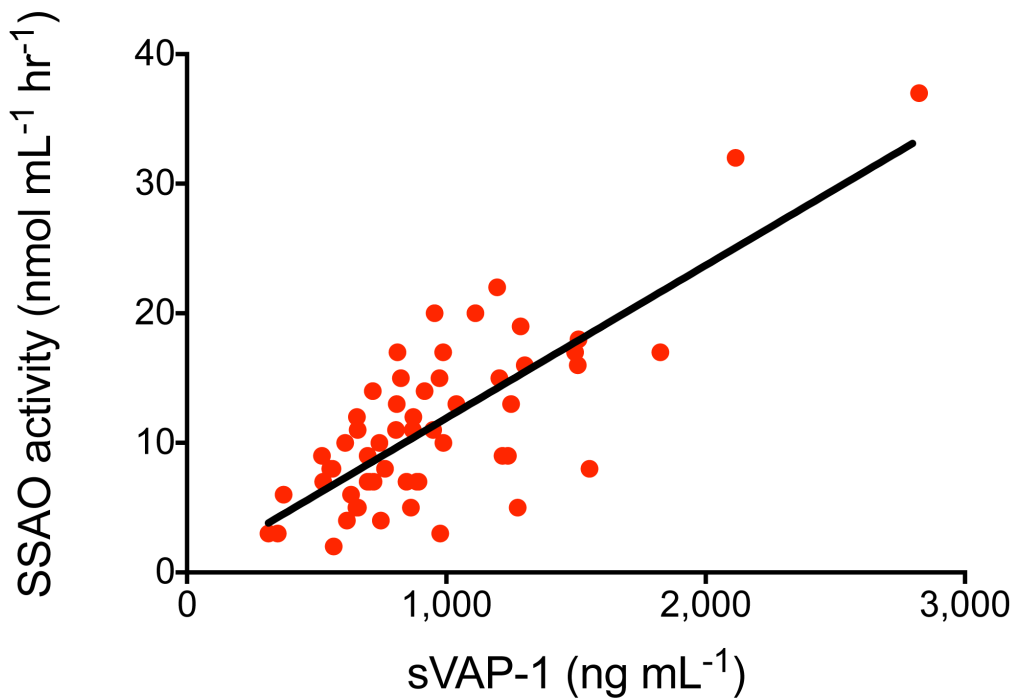

**Supplementary Figure 1: Soluble VAP-1 levels in serum taken from patients in the NAFLD cohort correlated with the amine oxidase (SSAO) activity.** Patient sVAP-1 levels (n=57) were measured by time-resolved fluorescence and amine oxidase activity was determined by Amplex Red based methodology. Pearson rank correlation coefficient = 0.77,  $p<0.0001$ .

Supplementary Fig 2

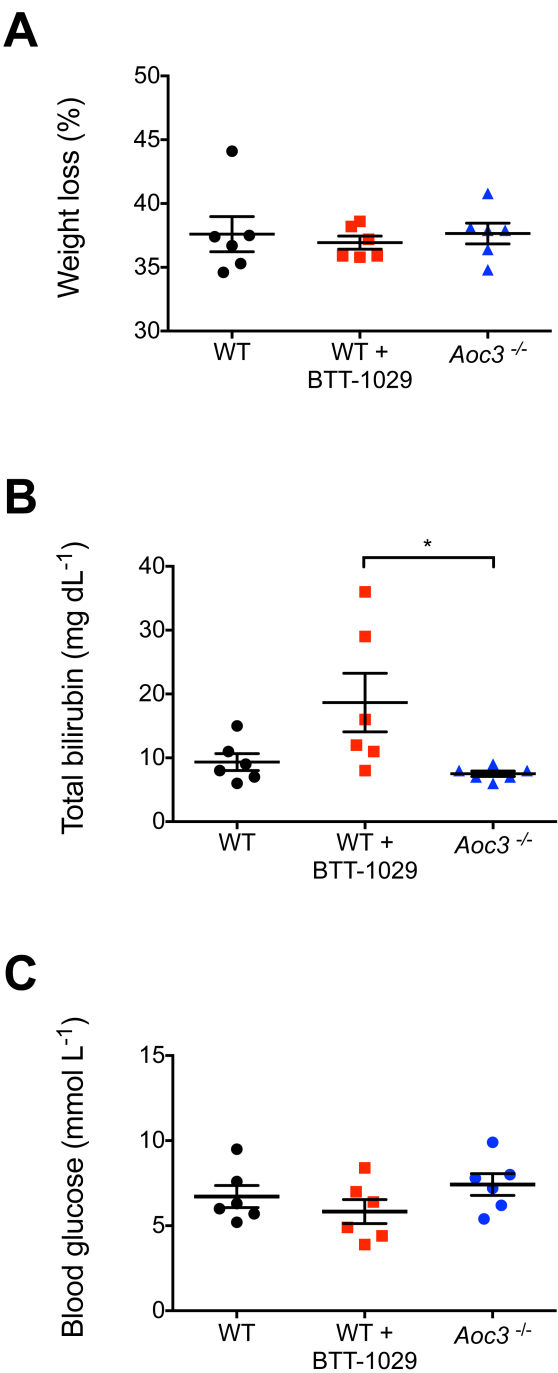

**Supplementary Figure 2: Physical (body weight) and biochemical properties (bilirubin, blood glucose) of *Aoc3*<sup>-/-</sup> and WT mice that received anti-VAP-1 antibody BTT-1029 did not differ greatly from WT animals when MCD diet for 6 weeks. 6 animals/group.**

Statistical test: One way ANOVA with Tukey's *post hoc* test. \* *p*<0.05.

Supplementary Fig 3

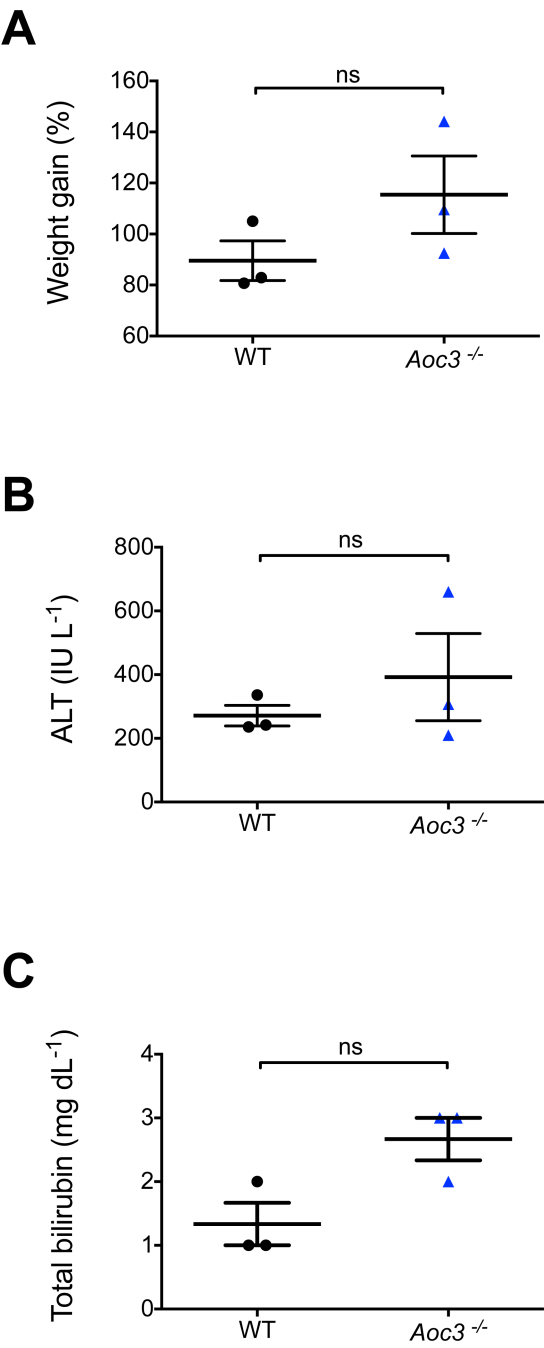

**Supplementary Figure 3: Physical (body weight) and biochemical properties (ALT, bilirubin) of *Aoc3*<sup>-/-</sup> mice did not differ from WT animals when fed a high fat diet for 18 weeks. 3 animals/group. Statistical test: Mann-Whitney test, ns – not significant.**

**A**

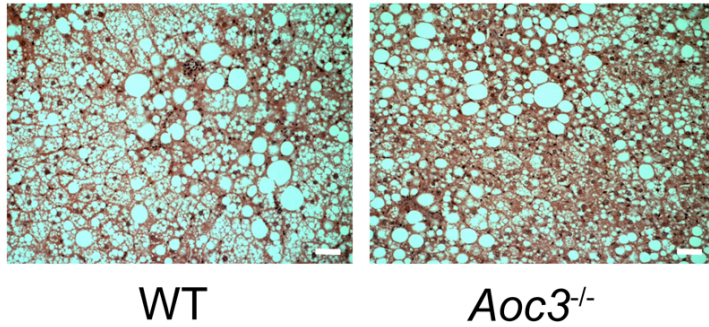

# B

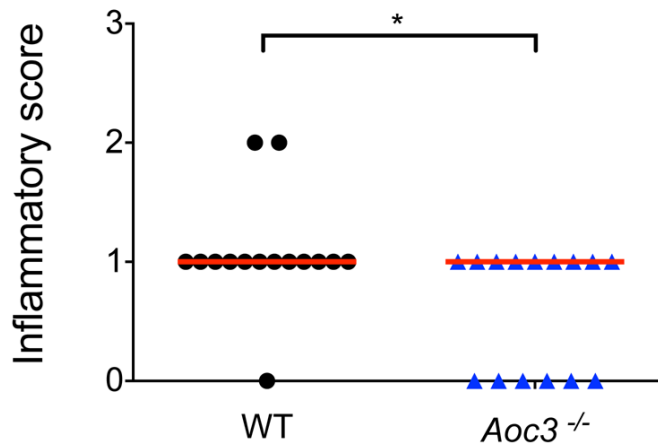

**Supplementary Figure 4: Liver sections taken from WT mice fed HFD had significantly higher inflammatory scores than those taken from *Aoc3*<sup>-/-</sup> animals.** (a) Haematoxylin and Eosin staining of liver tissue sections. Scale bar: 50  $\mu$ m. (b) Inflammatory score based on the number of inflammatory foci per field of view. 3 animals/group, 5 fields per animal. Statistical test: Mann-Whitney test. \*  $p < 0.05$ .

**A**

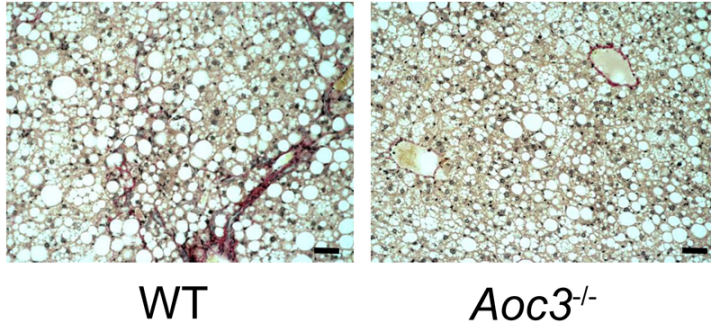

# B

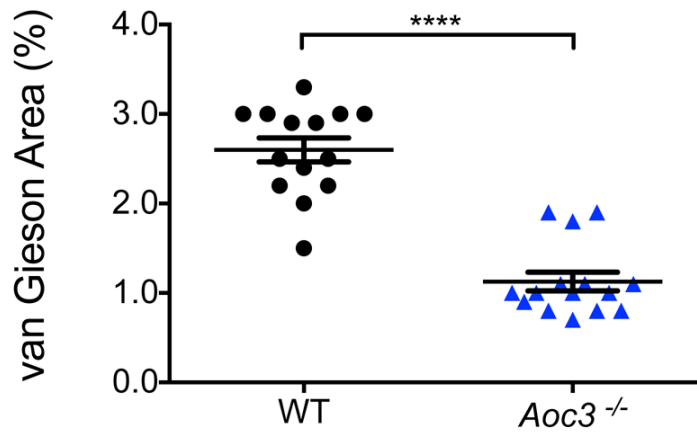

**Supplementary Figure 5: WT mice fed HFD developed significantly more hepatic fibrosis than *Aoc3*<sup>-/-</sup> mice on the same diet as measured by van Gieson staining for collagens.** Scale bar: 50  $\mu$ m. 3 animals/group, 4-5 fields/animal. Statistical test: Mann-Whitney test. \*\*\*\*  $p<0.0001$ .

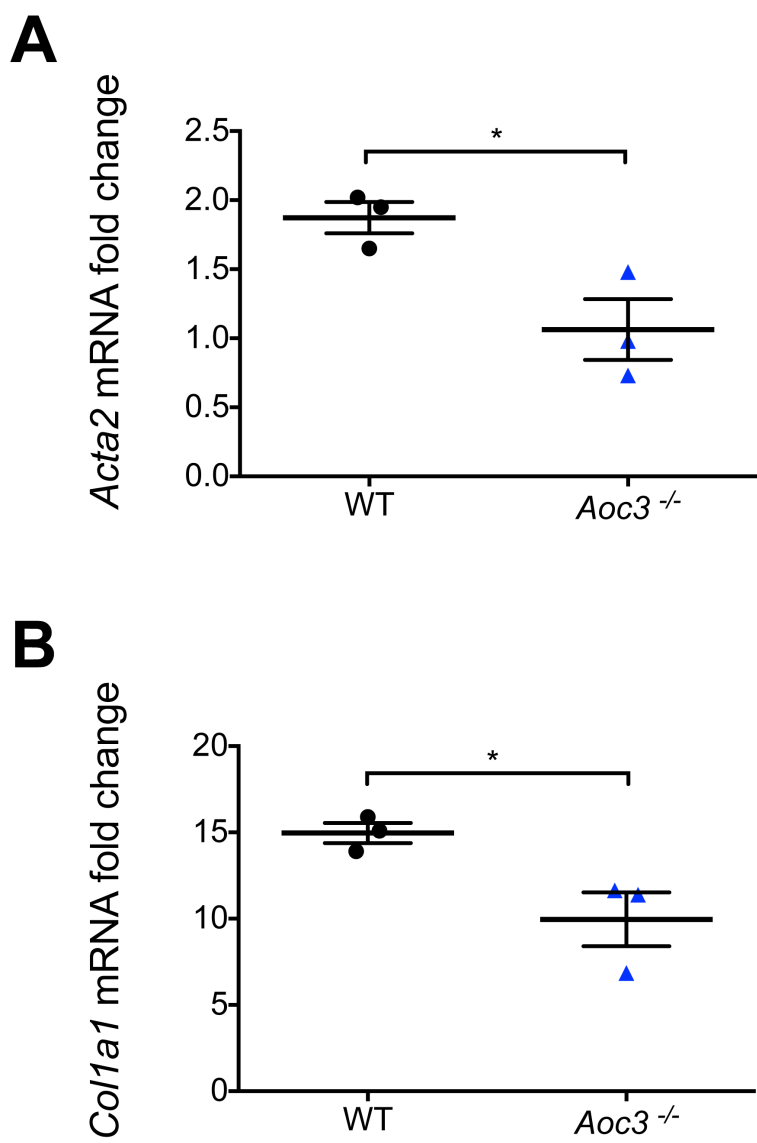

**Supplementary Figure 6: The expression levels of *Acta2* and *Col1a1* were significantly higher in WT mice fed HFD compared to *Aoc3*<sup>-/-</sup> animals. 3 animals/group. Statistical test: Unpaired t-test. \*  $p < 0.05$ .**

Supplementary Fig 7

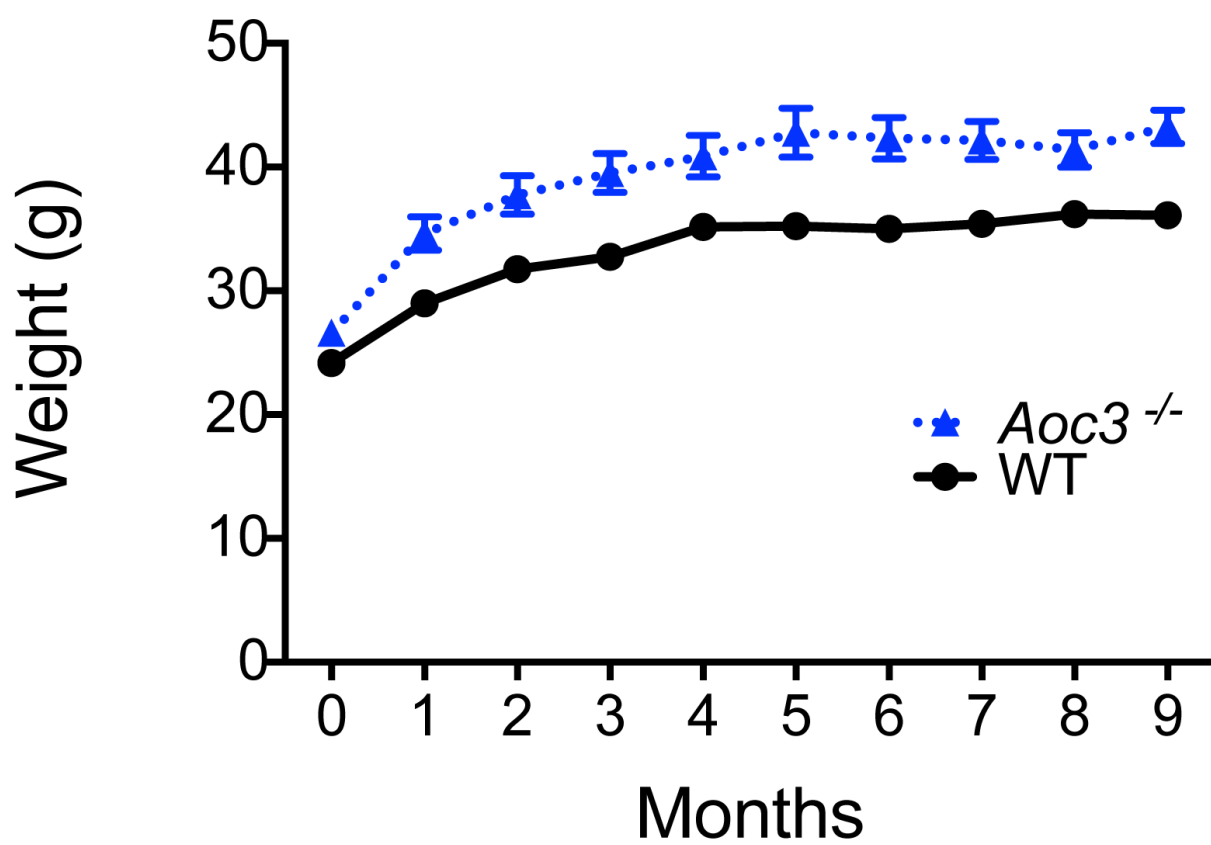

**Supplementary Figure 7: *Aoc3*<sup>-/-</sup> animals had an increased body weight compared to WT animals when maintained on WLM.** 2-way ANOVA with Sidak test,  $p < 0.01$  for months 1-9 (8 animals/group). No significant difference in body weight was observed at time zero (prior to being placed on the diet).

Supplementary Fig 8

**A**

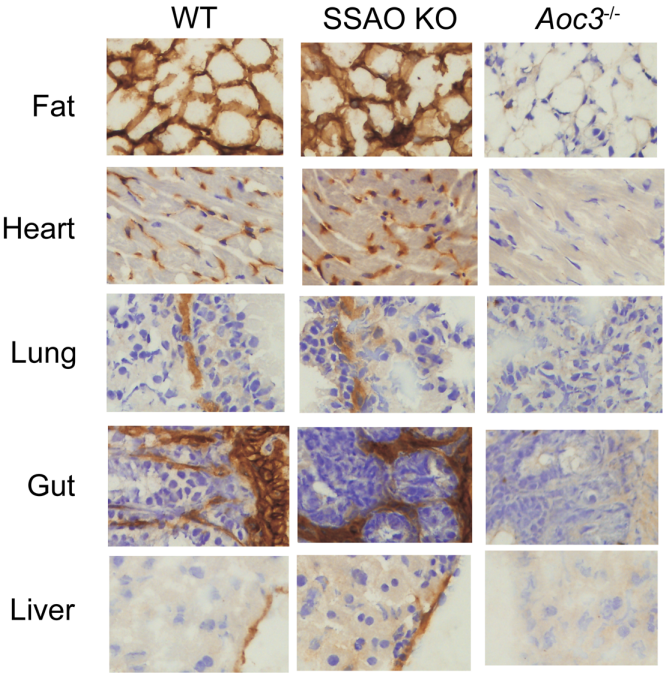

**B**

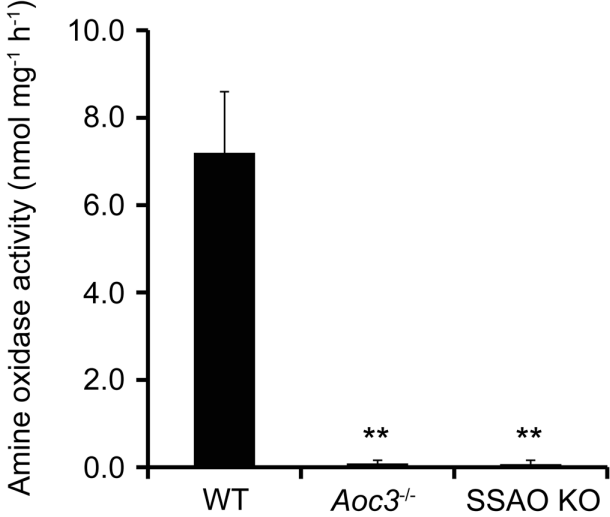

**Supplementary Figure 8: The tissue expression pattern of VAP-1 protein in animals harbouring a mutation in the active site of the enzyme was similar to that of the native protein.** (A) Immunohistochemistry was used to detect the expression of VAP-1 in murine tissues isolated from WT, SSAO KO and *Aoc3*<sup>-/-</sup> animals. The staining patterns for VAP-1 in WT and SSAO KO animals were similar, whereas the protein was absent in all tissues harvested from *Aoc3*<sup>-/-</sup> mice. (B) The catalytic activity of VAP-1 was undetectable in fat tissue lysates isolated from both SSAO KO and *Aoc3*<sup>-/-</sup> animals. 5 animals/group. Statistical test: Mann-Whitney test, \*\* *p*<0.01.

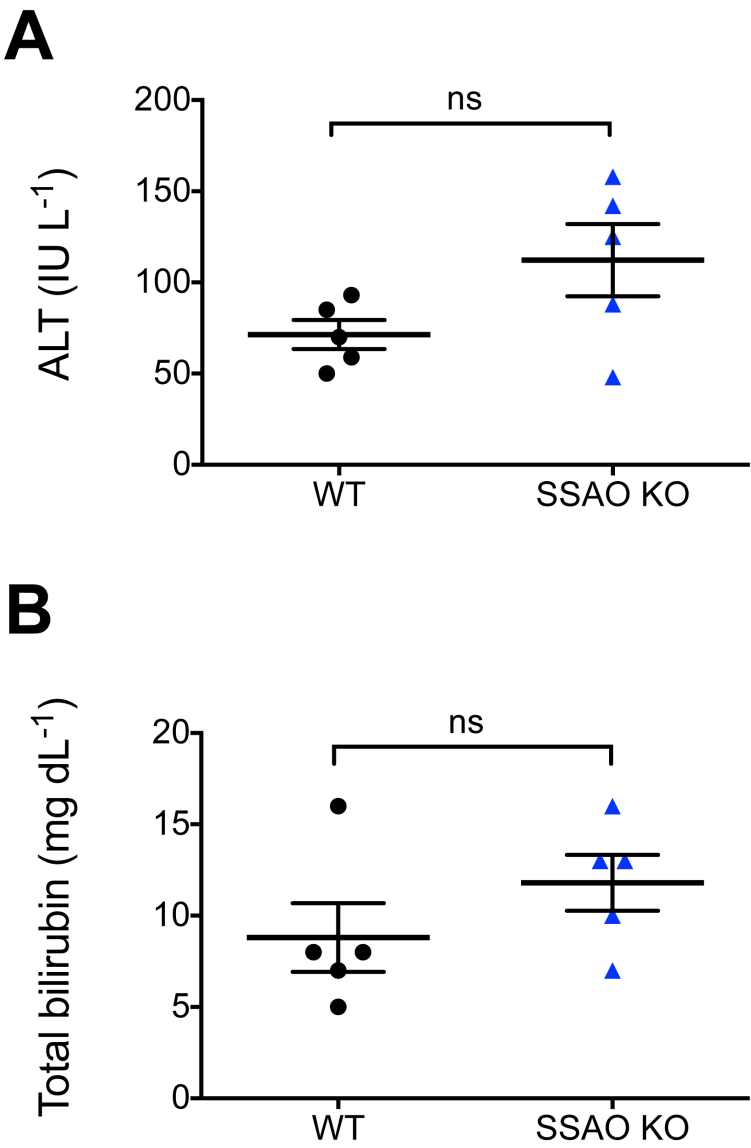

**Supplementary Figure 9: There were no significant differences in serum markers of liver injury in WT and SSAO KO animals fed MCD diet.** Serum levels of ALT and bilirubin were not significantly different between WT and SSAO KO animals following 4.5 weeks of MCD diet. 5 animals/group. Statistical test: Mann-Whitney test, ns – not significant.

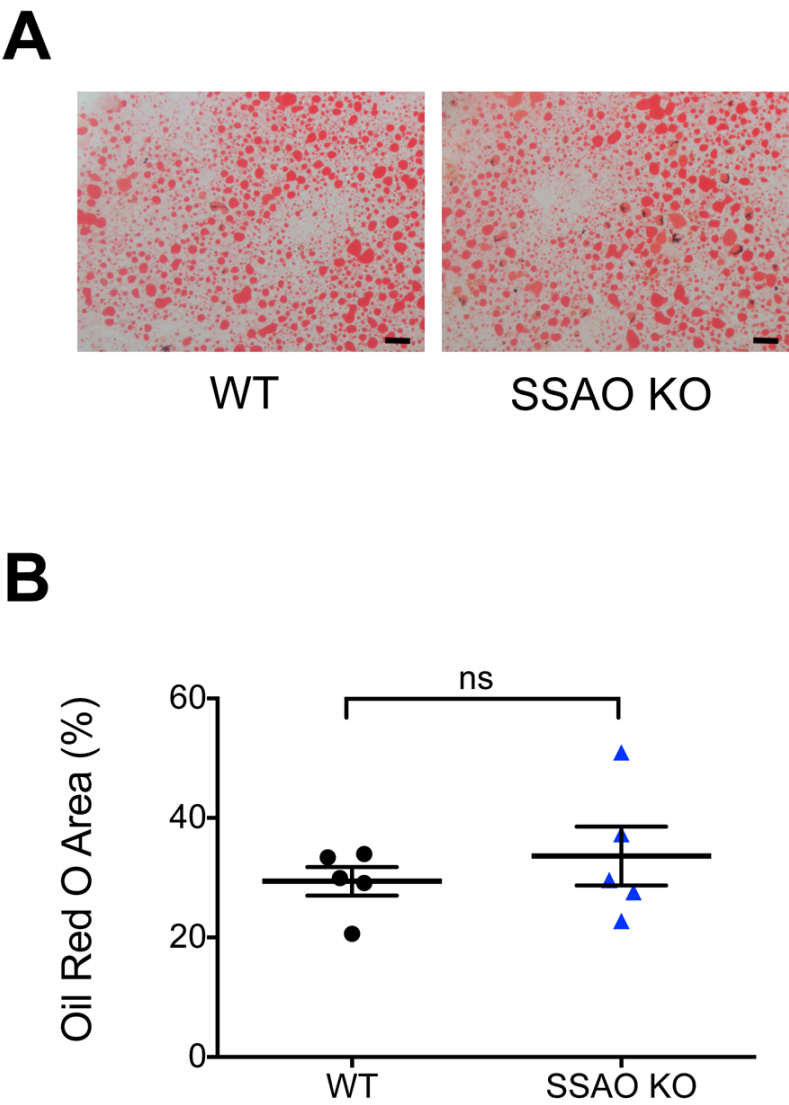

**Supplementary Figure 10: WT and SSAO KO animals developed similar levels of hepatic steatosis following 4.5 weeks MCD diet.** The surface area covered by the oil red O stain (a) was determined for 3-5 random fields with 5 animals per group (b). There was no significant difference between the two groups of animals. Scale bar: 50  $\mu$ m. Statistical test: Mann-Whitney test, ns – not significant.

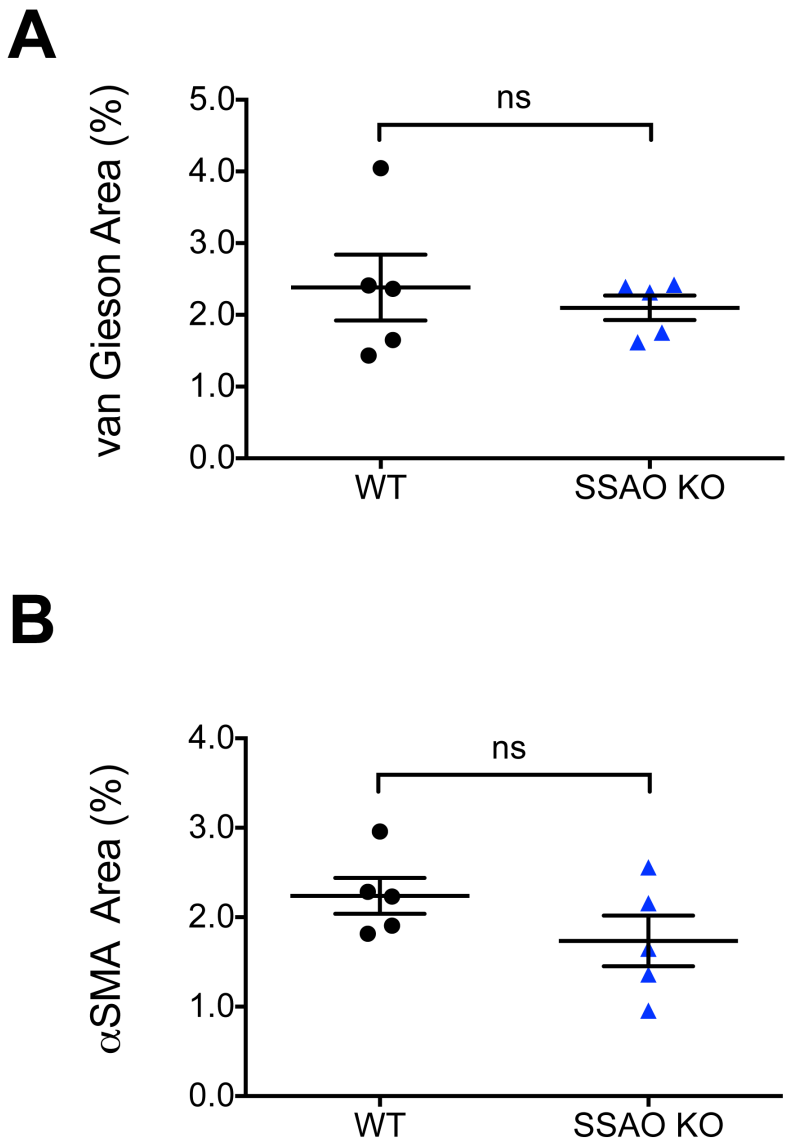

**Supplementary Figure 11: WT and SSAO KO animals exhibited similar levels of hepatic fibrosis following 4.5 weeks MCD diet.** The surface area covered by van Gieson stain (a) or immunohistochemistry for  $\alpha$ -SMA (b) did not differ significantly between WT and SSAO KO animals. 3-5 random fields for 5 animals per group. Statistical test: Mann-Whitney test, ns – not significant.

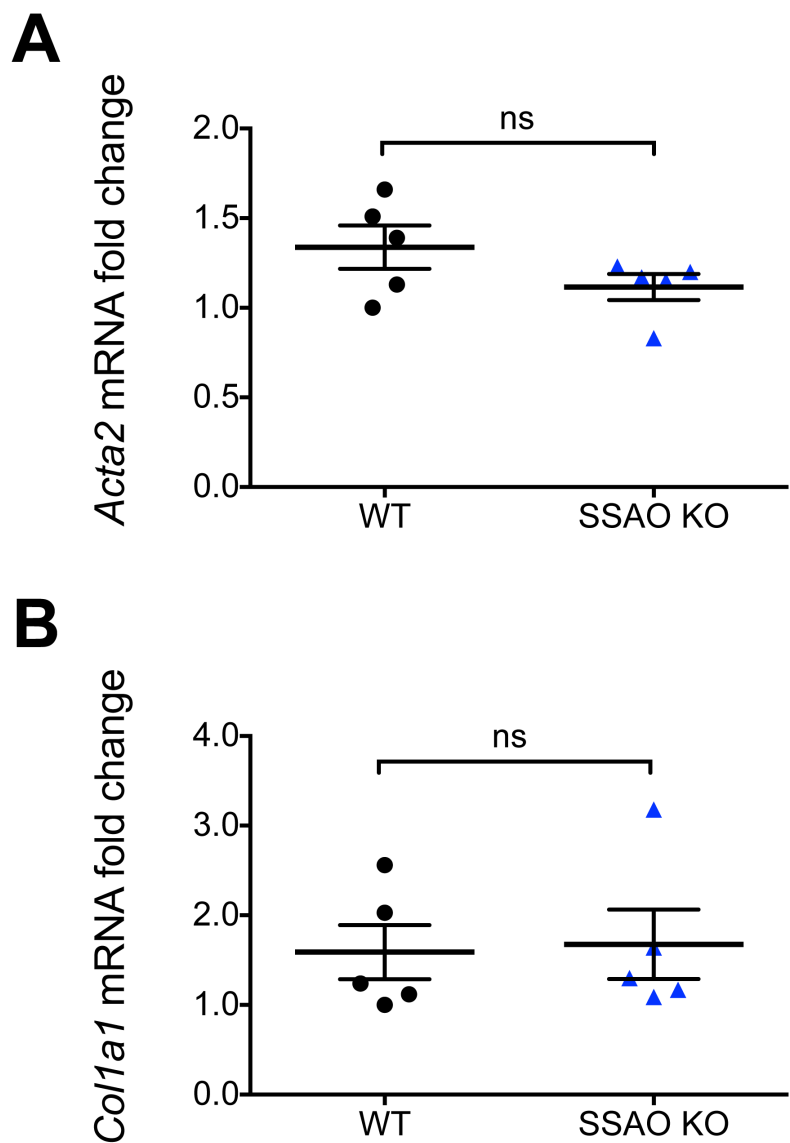

**Supplementary Figure 12: There were no significant differences in the expression of two fibrotic gene transcripts in WT and SSAO KO animals fed MCD diet for 4.5 weeks.** The expression of *Acta2* and *Col1a1* were not significantly different between WT and SSAO KO animals. 5 animals/group. Statistical test: Mann-Whitney test, ns – not significant.

Supplementary Fig 13

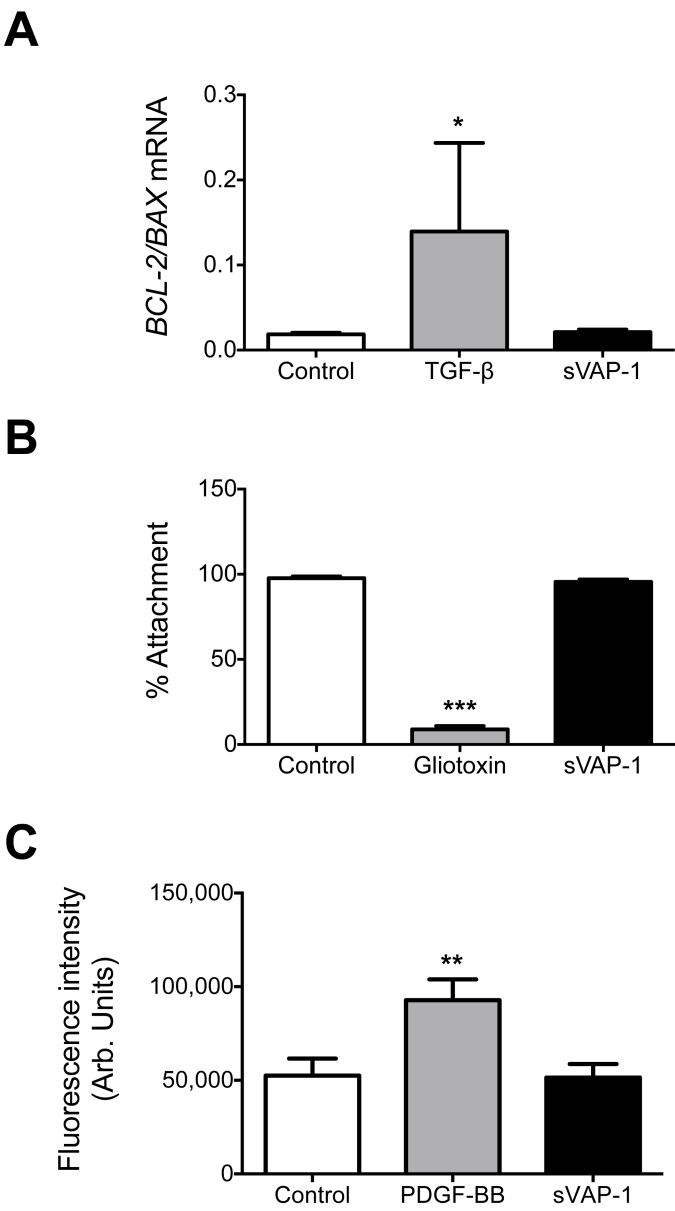

**Supplementary Figure 13: Soluble VAP-1 does not affect proliferation or apoptosis of aHSC.**

Treatment of human aHSC with 500 ng mL<sup>-1</sup> sVAP-1 did not alter: apoptosis (*BCL2/BAX* mRNA) (A), detachment (B), or proliferation (C). Responses to TGF- $\beta$  (10 ng mL<sup>-1</sup>), gliotoxin (1.5  $\mu$ M) and PDGF-BB (10ng mL<sup>-1</sup>) shown as positive controls. Statistical test: Mann-Whitney test, \*  $p<0.05$ , \*\*  $p<0.01$ , \*\*\*  $p<0.001$  (n=3 independent isolates).

**Supplementary Table 1: Parameters which independently correlated with sVAP-1 concentration following univariate analysis.**

| <b>Variable</b>       | <b><math>r_s</math> value</b> | <b><math>p</math> value</b> |
|-----------------------|-------------------------------|-----------------------------|
| Fibrosis stage        | 0.39                          | 0.000003                    |
| Lobular inflammation  | 0.35                          | 0.00005                     |
| Diabetes              | 0.32                          | 0.0002                      |
| AST/ALT               | 0.32                          | 0.0005                      |
| Age                   | 0.27                          | 0.002                       |
| Platelets             | -0.27                         | 0.002                       |
| Albumin               | -0.24                         | 0.006                       |
| Steatosis grade       | 0.21                          | 0.02                        |
| HOMA-IR               | 0.3                           | 0.03                        |
| AST                   | 0.15                          | 0.1                         |
| Hypertension          | 0.12                          | 0.2                         |
| BMI                   | 0.1                           | 0.3                         |
| ALT                   | -0.075                        | 0.4                         |
| Bilirubin             | 0.061                         | 0.5                         |
| GGT                   | 0.056                         | 0.5                         |
| Total cholesterol     | -0.033                        | 0.7                         |
| Triglycerides         | -0.026                        | 0.7                         |
| Ferritin              | -0.019                        | 0.8                         |
| Total cholesterol/HDL | -0.010                        | 0.9                         |

**Supplementary Table 2: Parameters which independently correlated with significant fibrosis (Kleiner score  $F \geq 2$ ) following univariate analysis.**

| <b>Variable</b>      | <b><math>r_s</math> value</b> | <b>Odds ratio (95% CI)</b> | <b><math>p</math> value</b> |
|----------------------|-------------------------------|----------------------------|-----------------------------|
| Lobular inflammation | 0.638                         | 27.853 (9.653-80.368)      | 0.0000001                   |
| sVAP-1 (continuous)  | 0.361                         | 1.003 (1.001-1.004)        | 0.00002                     |
| Diabetes             | 0.357                         | 4.607 (2.168-9.789)        | 0.00003                     |
| AST/ALT ratio        | 0.301                         | 6.144 (1.625-24.756)       | 0.001                       |
| Steatosis            | 0.280                         | 2.307 (1.372-3.870)        | 0.002                       |
| Age (per year)       | 0.249                         | 1.041 (1.010-1.072)        | 0.004                       |
| Hypertension         | 0.236                         | 2.628 (1.265-5.458)        | 0.01                        |

**Supplementary Table 3: Primer/Probe mixes for qRT-PCR used in this study.**

|                    | <i>Roche UPL</i> |                                                            | <i>Life Technologies</i> |
|--------------------|------------------|------------------------------------------------------------|--------------------------|
| <b>Target</b>      | <b>Probe</b>     | <b>Primers</b>                                             | <b>Taqman Assay ID</b>   |
| <i>AOC3</i>        | 49               | 5'-caatgagaccattgctggaa-3'<br>5'-tgtcctctgcatgtgggata-3'   | -                        |
| <i>BCL2</i>        | 2                | 5'-gcacctgcacacctggat-3'<br>5'-agggccaaactgagcaga-3'       | -                        |
| <i>BAX</i>         | 69               | 5'-gaaccatcatgggctgga-3'<br>5'-cgtcccaaagtaggagagga-3'     | -                        |
| <i>PBGD</i>        | -                | Catalogue # 05 046 149 001                                 | -                        |
| <i>Col1a1</i>      | 15               | 5'-gacatgttcagctttgtggac-3'<br>5'-gcagctgacttcagggatg-3'   | -                        |
| <i>Acta2</i>       | 56               | 5'-ccgccatgtatgtggctatt-3'<br>5'-cagttgtacgtccagaggcata-3' | -                        |
| <i>Gapdh</i>       | -                | Catalogue # 05 046 211 001                                 | -                        |
| <i>Actb</i>        | -                | Catalogue # 05 046 190 001                                 | -                        |
| <i>AOC3</i>        | -                | -                                                          | Hs00186647_m1            |
| <i>COL1A1</i>      | -                | -                                                          | Hs00164004_m1            |
| <i>PDGFRB</i>      | -                | -                                                          | Hs01019589_m1            |
| <i>LOXL2</i>       | -                | -                                                          | Hs00158757_m1            |
| <i>18S</i> (human) | -                | -                                                          | Hs99999901_s1            |
| <i>Col1a1</i>      | -                | -                                                          | Mm00801666_g1            |
| <i>Acta2</i>       | -                | -                                                          | Mm01546733_m1            |
| <i>Aoc3</i>        | -                | -                                                          | Mm00839624_m1            |
| <i>18S</i> (mouse) | -                | -                                                          | Mm03928990_g1            |
